# Supplementary material for: Prevalence of hypertension in Ghanaian society: a systematic review, meta-analysis, and GRADE assessment
Source: Syst Rev. 2021 Aug 7;10:220. doi: 10.1186/s13643-021-01770-x (PMC8349493; doi:10.1186/s13643-021-01770-x)
Supplement: Supplementary file 4 — Additional file 4. Characteristics of selected studies. [file 13643_2021_1770_MOESM4_ESM.xlsx]

## Sheet: selected studies
									Sample Size			Age			WHO Prevalence (BP greater or equal 140/90)			Crude Prevalence (BP greater or equal 160/95)			Mean (SD) SBP	Mean (SD) DBP	2# outcomes of interest	Risk factors	Awareness	Management	control
Number	Primary Reference	Auxiliary References	Study design	Data Collection Period	Region	Location	Community Type	Description of study and participants	Men	Women	Total	Range	Mean	SD	Men	Women	Total	Men	Women	Total
1	Pobee et al., (1977)		Survey	1972-1973	GA	Danfa cluster: 20 rural sites	Rural	general population	809	861	1670	16-75	n/a	n/a	n/a	n/a	n/a	4.2	4.8	4.5	men: 123.8 (19.7) women: 122.0 (21.0)	men: 69.2 (13.5) women: 68.8 (12.7)	n/a	n/a	n/a	n/a	n/a
2	Pobee et al., (1979)		Prospective cohort	Apr to Aug 1973	GA	Accra-Tema	Urban	civil servants	5520	1380	6900	15-64	n/a	n/a	n/a	n/a	n/a	9.8	4.3	8.9	n/a	n/a	awareness, management	n/a	17% (37/220 hypertensives)	17% (6/37 awareness)	n/a
3	Cappucio et al., 2004			June 2001 and June 2002	AR	12 villages	mixed	general population	385	628	1013	40-75	54.7	11.3	29.9	28	28.7	n/a	n/a	n/a	n/a	n/a	risk factors, Detection, Management, and Control	The prevalence rate increased with age in both men and women, and in both rural and semi-urban participants	22.0% (64/291)	11.3% (33/291)	2.8% (8/291)
4	Escalona et al., 2004			2000-2002	GA	6 sites	Urban and semi-urban	general population	257	341	598	15-65	n/a	n/a	27.6	26.1	26.8	n/a	n/a	n/a	n/a	n/a	risk factor	Therc was a positive rclationsliip bctwecn body mass and hypcrtcnsion.	n/a	n/a	n/a
5	Addo et al., 2006			2001	GA	multicenter: 4-sites in Amasaman sub-district of Accra	Rural	general population	107	255	362	18-19	42.4	18.6	24.1	25.9	25.4	n/a	n/a	15.2	all: 127.5 (25.8) male: 125.4 (20.9) female: 128.46 ( 27.6)	all: 74.0 (14.3) male: 74.5 (14.2) female: 73.86 (14.4)	risk factors, awareness, treated and controlled	Overweight and obesity are modifiable risk factors for hypertension	32.3% of hypertensives (n=30)	12.9% of hypertensives (n=12)	16.7% (2 of 12)
6	Burket 2006			2002	VR	Liati; Tokor	Rural	general population	66	221	287	17-60	41.8		39.4	30.7	32.8	n/a	n/a	n/a	n/a	n/a	risk factors, awareness, treated and controlled	Factors associated with hypertension included family history of hypertension, consumption of akpeteshie, location of blood pressure assessment, and consumption of non-smoked fish (inverse association).	see other sources	see other sources	see other sources
7	Agyeman et al., 2006			2004	AR	Kumasi; 4-sites	mixed	general population	644	787	1431	16-50	35.9	n/a	30.2	28	29.4	n/a	n/a	n/a	rural men: 129.2 (127.1, 131.2) urb. men: 132.9 (131.3, 134.5) rural women: 126,3 (124.3, 128.3) urb. women: 130.8 (129.1, 132.6)	rural men: 75.2 (74.1, 76.9) urb. Women: 78.4 (77.3, 79.5) rural women: 75.5 (74.3, 76.7) urb. Women: 80.2 (79.1, 81.2)	risk factors, awareness, treatment and control	Age-adjusted mean systolic and diastolic BP levels were lower in rural men than in urban men (129/75 versus 133/78, P!0.001). The mean systolic and diastolic BP levels were also lower in rural women than in urban women (126/76 versus 131/80.	34% of hypertensives,	28% of hypertensives	6.2% of hypertensives
8	Hill et al., 2007	Duda, R. B., Kim, M. P., Darko, R., Adanu, R. M., Seffah, J., Anarfi, J. K., & Hill, A. G. (2007). Results of the Women's Health Study of Accra: assessment of blood pressure in urban women. International journal of cardiology, 117(1), 115-122. Duda RB, Anarfi JK, Adanu RM, Seffah J, Darko R, Hill AG. The health of the “older women” in Accra, Ghana: results of the Women’s Health Study of Accra. Jo…		2003	GA	Accra	urban	general population (women)	0	1328	1328	18-100	46.8	18	n/a	40.2	40.2	n/a	n/a	n/a	n/a	n/a	risk factors	Risk factors for hypertension include age ≥50 years; menopause at age <50; and obesity and no formal education	n/a	n/a	n/a
9	Owiredu et al., 2008			2005	AR	3 communities	urban	Church adherents	117	266	383	18-85	41.6	13.4	SBP/DBP: 11.9/9.4	SBP/DBP: 29.3/25.6	SBP/DBP: 24.0/20.6	n/a	n/a	n/a	all: 123.6 (20.5) male: 117.7 (15.7) female: 126.4 (21.8)	all: 76.2 (12.8) male: 72.9 (10.3) female: 77.7 (13.5)	risk factors	central obesity	n/a	n/a	n/a
10	Addo et al., 2009	[1] doi.org/10.1016/j.puhe.2009.02.003 [2] doi:10.1136/jech.2008.081828 J. Addo et al. / Public Health 123 (2009) 365–370	Cross-sectional	Jan and Sep 2006.	GA	Accra	Urban	civil servants	615	400	1015	25-68	44	10.2	31.7	28	30.2	n/a	n/a	n/a	n/a	n/a	risk factors	Obesity. There was a positive graded association between adult wealth and hypertension, with more assets associated with a greater risk (p trend 0.008). This trend was partly explained by body mass index differences. . Men of higher pre-adult or current socio-economic position generally had higher mean BMI and waist circumference	n/a	n/a	n/a
11	Kunutsor & Powles 2009			2007	UE	Kassena-Nankana District	rural	general population	207	367	574	18-65	37.8	14.1	n/a	n/a	19.3	n/a	n/a	n/a	age-adj male; 124.25 (18.67) female: 122.07 (22.01)	age-adj male: 69.92 (12.09) female: 72.11 (12.35)	risk factors, high salt intake	Regression analyses showed that SBP was significantly associated with age, BMI, waist circumference and time of BP measurement (p <0.000). In multiple regression analyses, age and BMI were independently associated with SBP and DBP in women (p <0.001). Time of BP measurement was independently associated with SBP but only in men (p <0.001).	n/a	n/a	n/a
12	Koopman 2012			2009	UE	Garu-Tempane District	rural	Adults >50 years	480	444	924	n/a	n/a	n/a	25.7	22.5	24.1	n/a	n/a	n/a	median (IQR) male: 120 (110–135) female: 120 (110-135)	median (IQR) male: 75 (70–80) female: 70 (65-75)	n/a	n/a	n/a	n/a	n/a
13	Williams et al., 2013				AR	Barekese sub district	Rural		152	273	425	35 or greater					0.447				All: 134.38 (21.46) men: 134.47 (18.24) women: 134.33 (23.09)	All: 84.32 (12.44) men: 86.36 (11.35) women: 83.19 (12.87)	Risk factors, awareness, treatment and control	There were several factors identified to be related to BP in this rural community. These included age, level of education, BMI, and self-reported levels of alcohol, salt or saturated fat consumption. Blood pressure was found to be positively correlated with these factors.	n/a	0.649	0.089
14	Minicuci 2014	[1] Minicuci 2014 [2] Tenkorang et al., 2017 [3] Gebreselassie et al., 2014		2007-2008	All	Nationwide	mixed	Adults >50 years	2348	2376	4724	n/a	n/a	n/a	51.5	50.7	51.1	n/a	n/a	n/a	n/a	n/a	regional prevalence, health behaviours, risk factors of hypertension	Table 5 shows the ORs for measured and self-reported hypertension, adjusted for tobacco use and alcohol consumption. As a whole, only residence and the BMI appear to be associated with both hypertension outcomes (rural residence and underweight are protective factors, while overweight and obesity are risk factors) and with similar statistical measure of strength. Not significantly associated with…	n/a	n/a	n/a
15	Awuah et al., 2014	DOI:10.1097/HJH.0000000000000165		Jun 2010 and Dec 2011	GA	James Town, Ussher Town and Agbogbloshie	urban	urban poor	329	385	714	men: 15-59 women: 15-49	31	10.6	31	25.6	28.3				All: 121.6 (16.6) men: 124.4 (15.9) women: 119.4 (16.7)	All: 76.5 (11.9) men: 77.5 (12.2) women: 75.4 (11.5)	awareness, treatment and control of hypertension	n/a	male: 3 (3.1%) female: 12 (11.9%) all: 7.4% (15/202)	male: 1 (1.3%) female: 7 (6.5%) all: 4.0% (8/202)	male: 2 (2.1%) female: 5 (5.0%) all: 3.5% (7/202)
16	Obirikorang et al., 2015	doi:10.1371/journal.pone.0129494			AR	Kumasi: Jachie Pramso:	Mixed	general population	312	360	672		median: 50		46.2	25	34.8				urban: 133.0 (121–141) rural: 133.5 (119–145)	urban: 80.0 (77.0–85.0) rural: 79.5 (72.0–87.0)	determinants of urban-rural differences in cardio-metabolic risk factors	n/a	n/a	n/a	n/a
17	Kodaman et al., 2016	doi:10.5061/dryad.dr130			BR	Sunyani and surrounding communities	2265 urban: 68% 1293 rural: 32%	general population	0.44	0.56	3317	18-99	median: 42-43.5		Urban: 0.34 (0.31, 0.37) Rural: 0.20 (0.16, 0.24)	Urban: 0.32 (0.30, 0.35) Rural: 0.21 (0.18, 0.24)	n/a	n/a	n/a	n/a	Urban F: 125.1 (18.3) Rural F: 123.8 (20.2) Urban M: 130.2 (18.9) Rural M: 127.3 (16.9)	Urban F: 77.7 (10.7) Rural F: 73.7 (11.6) Urban M: 78.0 (12.4) Rural M: 73.5 (10.8)	n/a	n/a	n/a	n/a	n/a
18	Stringhini et al., 2016	[1] DOI 10.1186/s12889-016-3589-5 [2] DOI 10.1093/ije/dyt017 [3] DOI 10.1186/s12889-015-2233-0 [4] doi:10.1186/1471-2458-11-927.		Jan 2010 and Dec 2011	AR	Nkwantakese (Afigya-Kwabre District)	Rural	general population	176	265	441	25-45	n/a	n/a	n/a	n/a	4.5						n/a	n/a	n/a	n/a	n/a
19	Nuertey 2017		cross-sectional study	April to December of 2014	All	Nationwide	mixed	Pensioners	3069	1402	4471	56+	67.2	5.4	n/a	n/a	47.8	n/a	n/a	n/a	Male: 146 (25) Female: 146 (26)	Male: 79 (16) Female: 79 (16)	n/a	n/a	n/a	n/a	n/a
20	Osman 2017		cross-sectional study	November to December 2016	AR	Kumasi Metropolis, Atwima Nwabiagya district, Ejisu- Juaben Municipality and Asante Akim Central Municipality	mixed	Adults >65 years	135	265	400	n/a	74.4	n/a	57.8	52.5	54.3	n/a	n/a	24	Male: 144 (22) Female: 144 (24)	Male: 90 (16) Female: 88 (15)	n/a	n/a	n/a	n/a	n/a
21	Lamptey et al., 2017		a quasi-experimental study consisting of two parts (cross-sectional surveys, and a cohort study)		ER	Lower Manya-Krobo Nsawam-Adoagyiri, and Akwapim South District	urban	general population	0.36	0.64	2337	over 30	49		33	32	32.4	n/a	n/a	n/a			hypertension awareness, treatment/control, risk factors	When adjusted for age, risk factors with the greatest association with hypertension were being overweight (aOR = 2.30; 95% CI 1.53–3.46) or obese (aOR = 3.61; 95% CI 2.37–5.51), although significant associations were also observed with increased waist/hip ratio (aOR = 1.43; 95% CI 1.30–157), MUAC (aOR = 1.47; 95%CI 1.34–1.62), high waist circumference (aOR = 1.47; 95% CI 1.34–1.61), and having so…	46.2% (350/757)	4.1% (31/757)	32.3% (10/31)
22	Agyeman et al., 2017	Agyemang C, Beune E, Meeks K, Owusu-Dabo E, Agyei-Baffour P, Aikins Ad. et al. Rationale and cross-sectional study design of the research on obesity and type 2 diabetes among African migrants: the RODAM study. BMJ Open 2014; 4:e004877.	multicenter cross-sectional study	2012 to 2015	International	Ghana, Amsterdam, London, and Berlin	mixed	Ghanaians and Ghanaian migrants	2136	3523	5659	25-70			Rural Ghana: 22.7 Urban Ghana: 33.6 London: 51.0 Amsterdam: 52.4 Berlin: 57.1	Rural Ghana: 27.9 Urban Ghana: 31.4 London: 49.3 Amsterdam: 49.9 Berlin: 52.2	Rural Ghana: 21.8 Urban Ghana: 25.3 London: 39.5 Amsterdam: 39.8 Berlin: 44.1	n/a	n/a	n/a			awareness, treatment and control of hypertension	n/a	male: 36.2% (84/232) female:53.1% (256/482)	male: 18.5(43/232) female: 37.6(181/482)	male: 48.8 (21/43) female: 51.9 (94/181)
23	Gomez-Olive et al., 2017	[1] doi:10.1016/j.gheart.2017.01.007 [2] see comment	multicenter cross-sectional population study	Aug 2013 and Aug 2016	UE	Navorongo	rural	general population	917	1071	1988	40-60	51.02	5.74	0.241	0.248	0.245	n/a	n/a	n/a	n/a	n/a	awareness, treatment and control of hypertension	n/a	male: 21.4% (47/220) female: 34.6% (92/266)	male: 80.4(37/46) female: 90.2(83/92)	male: 37.8 (14/37) female: 39.8 (33/83)
24	Acheampong et al 2019			Sep -Nov 2017	GA	Kpone-Katamanso District	semi-urban	general population (women)	n/a	216	216	25+	49.6	13.3	n/a	33.8	33.8	n/a	n/a	n/a	Female: 126(18)	Female: 80 (13)	risk factors,	After adjustment for age, marital status, education status, employment status, alcohol drinking, the participants who were 45-64 years [AOR =2.19, (95% CI: 1.11-4.34, p<0.02)] and 65+ years [AOR =5.13, (95% CI: 2.20-11.99), p<0.001] were two to five times as likely as those with age of 25-44 years to be hypertensive. Participants who were obese were two times as likely as those who have normal we…	n/a	n/a	n/a
25	Dosoo et al 2019			Oct 2015 to Dec 2016	BE	Kintampo Municipality	semi-urban	general population	1009	1546	2555	18+	43	n/a	27.4	23	28.1	n/a	n/a	n/a	n/a	n/a	risk factors, awareness, treated and controlled	Risk factors found to be associated with one being hypertensive were current tobacco usage (p = 0.053), past tobacco usage (p < 0.001), prediabetes (p = 0.042), high BMI (p < 0.001), hyperglycaemia (p = 0.038), and hypercholesterolaemia (0.010), whereas being active in sports and doing vigorous work were both less associated with hypertension (p < 0.001) (Supplementary 1). -e risk factors were th…	18-39yrs:36.0% (28.7–44.0) 40-59yrs: 47.9% (42.4–53.5) >60yrs: 49.2% (43.1–55.3) All: 45.9% (42.2–49.6)	n/a	18-39yrs:18.5 (10.2–31.3) 40-59yrs: 37.2 (29.7–45.3) >60yrs: 55.9 (47.1–64.3) All: 41.3 (36.1–46.8)
26	Anto et al., 2020		multicenter cross-sectional population study	January 2015 to May 2016	GA, AR	Accra	Urban	Bus drivers	527	n/a	527	30-69	44.07	9.29	38.7	n/a	38.7	n/a	n/a	n/a	n/a	n/a	risk factors	Ageing, smoking history, alcoholic beverage intake, sleep inhibitor drug use, high calorie intake, long-duration sitting, eating late and under stressful conditions were independent risk factors for hypertension	n/a	n/a	n/a
27	Duah et al., 2013		cross-sectional	2007	AR	Adansi	Urban	General population	249 (46.2%)	290 (53.8%)	539	5 and above	n/a	n/a	n/a	n/a	27.1	n/a	n/a	n/a	n/a	n/a	n/a	n/a	n/a	n/a	n/a
